# Supplementary material for: SP2509, a specific antagonist of LSD1, exhibits antiviral properties against Porcine epidemic diarrhea virus
Source: PubMed Central journal article supplement (PMC11084069; doi:10.1186/s12917-024-04052-5), 2024-05-10

Fig 1B

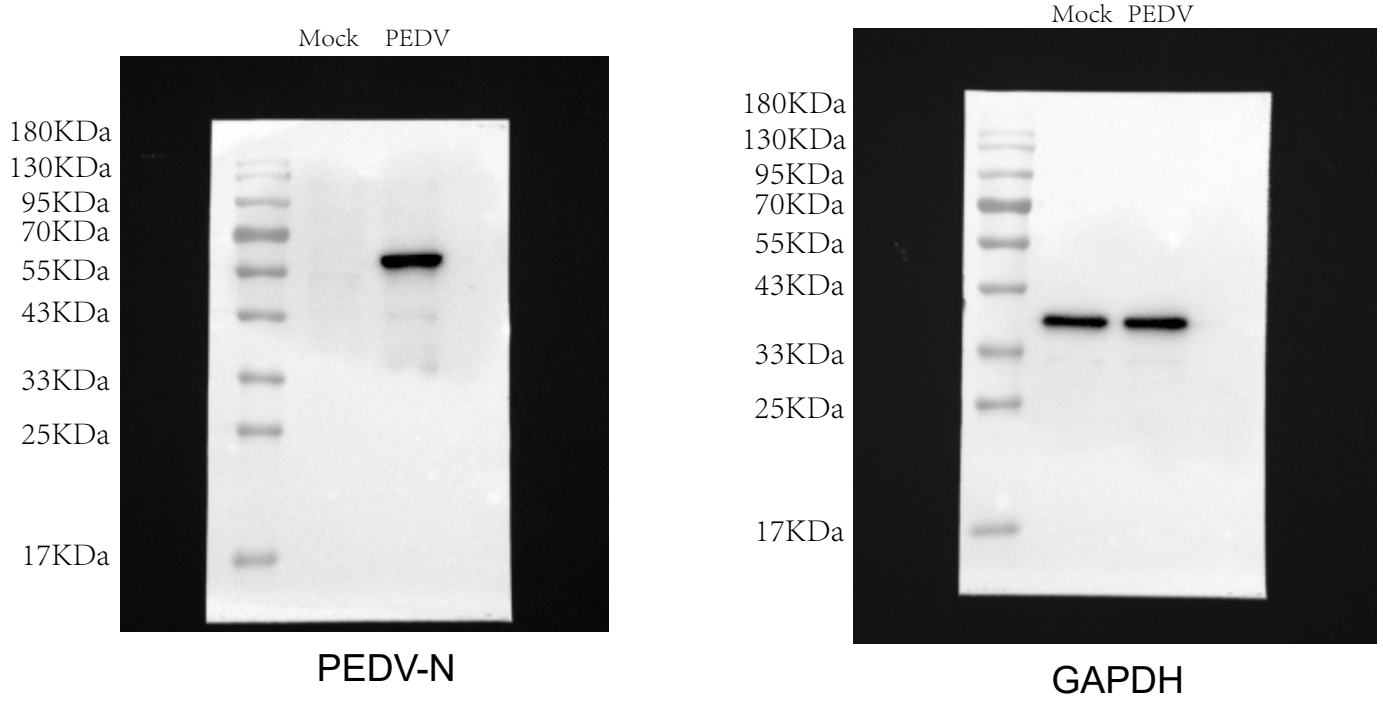

Fig 3B

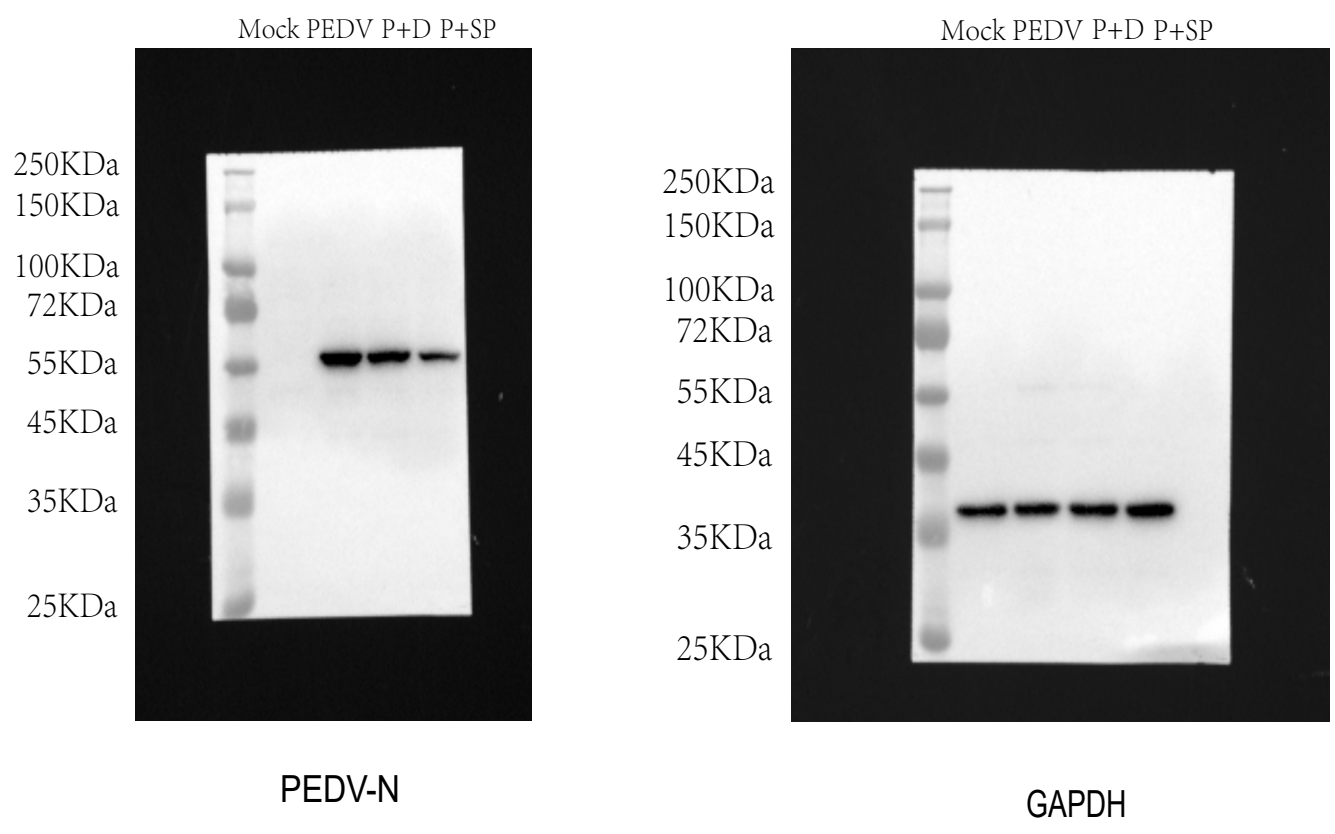

Supplement: 12917_2024_4052_MOESM1_ESM.pdf [file 12917_2024_4052_MOESM1_ESM.pdf]
