# Supplementary material for: SP2509, a specific antagonist of LSD1, exhibits antiviral properties against Porcine epidemic diarrhea virus
Source: PubMed Central journal article supplement (PMC11084069; doi:10.1186/s12917-024-04052-5), 2024-05-10
Supplement: 12917_2024_4052_MOESM4_ESM.pdf [file 12917_2024_4052_MOESM4_ESM.pdf]

Table S1. The primers for RT-qPCR

| Gene      | Forward Primer                 | Reverse Primer                  |
|-----------|--------------------------------|---------------------------------|
| GAPDH     | TCACTGCCACCCAGAAGACT           | ATGACCTTGCCACAGCCTT             |
| PEDV-ORF3 | GCA CTT ATT GGC AGG CTT<br>TGT | CCATTGAGAAA GAA AGT GTC<br>GTAG |

Table S2. Oligonucleotide sequences shRNA lentiviral vector cloning

|          |                                                               |
|----------|---------------------------------------------------------------|
| shLSD1-F | CCGGCACAAGGAAAGCTAGAAGAACTCGA<br>GTTTCTTCTAGCTTTCCTTGTGTTTTT  |
| shLSD1-R | AATTAAAAACACAAGGAAAGCTAGAAGAAA<br>CTCGAGTTTCTTCTAGCTTTCCTTGTG |
| shNT-F   | CCGGCGTGATCTTCACCGACAAGATCTCGAGA<br>TCTTGTCGGTGAAGATCACGTTTTT |
| shNT-R   | AATTAAAAACGTGATCTTCACCGACAAGATCT<br>CGAGATCTTGTCGGTGAAGATCACG |
